# Supplementary material for: A large-scale genomic investigation of susceptibility to infection and its association with mental disorders in the Danish population
Source: PubMed Central journal article supplement (PMC6848113; doi:10.1038/s41398-019-0622-3), 2019-11-11

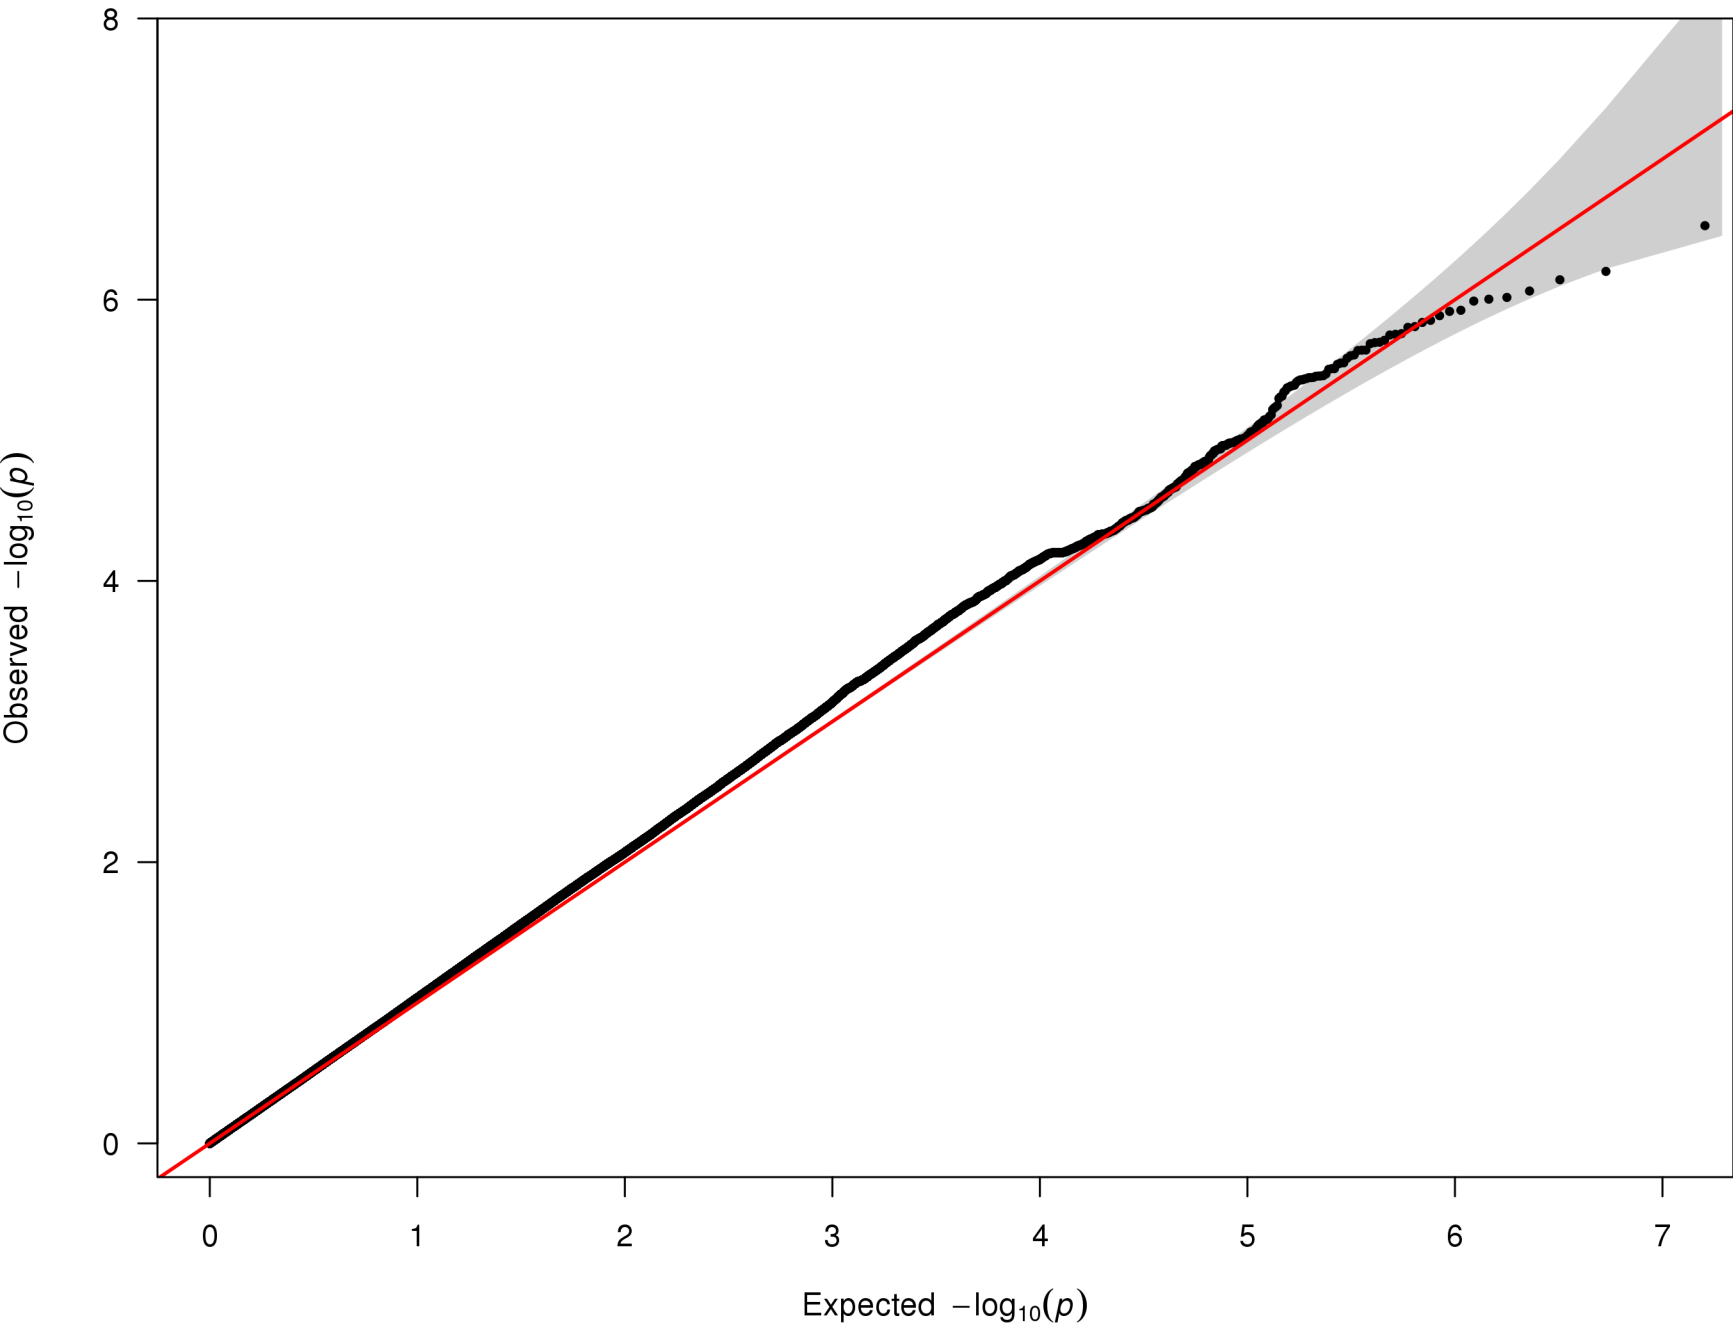

Supplement: 41398_2019_622_MOESM2_ESM.pdf [file 41398_2019_622_MOESM2_ESM.pdf]
